# Supplementary material for: Electric Field Induced Drift of Bacterial Protein Toxins of Foodborne Pathogens Staphylococcus aureus and Escherichia coli from Water
Source: MDPI journal article supplement (doi:10.3390/app122412739), 2022-12-12
Supplement: s1 [file s1]

Table S1: Amino acid sequences of a) *Staphylococcus aureus* alpha-hemolysin (<https://www.ncbi.nlm.nih.gov/protein/OBY01299.1>, accessed on 1 October 2022), b) *Staphylococcus aureus* toxic shock syndrome toxin-1 (TSST-1) [32] , c) *Staphylococcus aureus* enterotoxin type A (<https://www.ncbi.nlm.nih.gov/protein/QTN49470.1>, accessed on 1 October 2022) d, e) Shiga toxin Stx2 subunit A and subunit B [33]

a) Toxin 1: *Staphylococcus aureus*, a hemolysin

|            |            |            |            |            |
|------------|------------|------------|------------|------------|
| 10         | 20         | 30         | 40         | 50         |
| TTLLLSILM  | MKTRIVSSVT | NPVANAADSD | INIKTGTTDI | GSNTTVKTGD |
| 60         | 70         | 80         | 90         | 100        |
| LVTYDKENGM | HKKVFYSFID | DKNHNKLLV  | IRTKGTIAGQ | YRVYSEEGAN |
| 110        | 120        | 130        | 140        | 150        |
| KSGLAWPSAF | KVQLQLPDNE | VAQISDYYP  | NSIDTKEYMS | TLTYGFNGNV |
| 160        | 170        | 180        | 190        | 200        |
| TGDDTGKIGG | LIGANVSIGH | TLKYVQPDFK | TILESPTDKK | VGWKVIFNNM |
| 210        | 220        | 230        | 240        | 250        |
| VNQNWGPYDR | DSWNPVYGNQ | LFMKTRNGSM | KAAENFLDPN | KASSLLSSGF |
| 260        | 270        | 280        | 290        | 300        |
| SPDFATVITM | DRKASKQQTN | IDVIYERVRD | DYQLHWTSTN | WKGTNTKDKW |
| 310        |            |            |            |            |
| TDRSSERYKI | DWEKEEMTN  |            |            |            |

b) Toxin 2: *Staphylococcus aureus*, toxic shock syndrome toxin-1

|            |            |            |            |            |
|------------|------------|------------|------------|------------|
| 10         | 20         | 30         | 40         | 50         |
| MNKKLLMNFF | IVSPLLLATI | ATDFTPVPLL | SNQIIKTAKA | STNDNIKDLL |
| 60         | 70         | 80         | 90         | 100        |
| DWYSSGSDTF | TNSEVLDNSL | GSMRIKNTDG | SISLIIFPSP | YSPAFTKGE  |

|            |            |            |            |            |
|------------|------------|------------|------------|------------|
| 110        | 120        | 130        | 140        | 150        |
| KVDLNTKRTK | KSQHTSEGTY | IHFQISGVTN | TEKLPTPIEL | PLKVKVHGKD |
| 160        | 170        | 180        | 190        | 200        |
| SPLKYWPKFD | KKQLAISTLD | FEIRHQLTQI | HGLYRSSDKT | GGYWKITMND |
| 210        | 220        | 230        |            |            |
| GSTYQSDLSK | KFEYNTEKPP | INIDEIKTIE | AEIN       |            |

c) Toxin 3: *Staphylococcus aureus*, enterotoxin type A

|            |            |            |            |            |
|------------|------------|------------|------------|------------|
| 10         | 20         | 30         | 40         | 50         |
| MKKTAFILLL | FIALTWTTSP | LVNGSEKSEE | INEKDLRKKS | ELQGAALGNL |
| 60         | 70         | 80         | 90         | 100        |
| KQIYYYNEKA | KTENKESHDQ | FLQHTILFKG | FFTNHWSYND | LLVDFDSKDI |
| 110        | 120        | 130        | 140        | 150        |
| VDKYKGKKVD | LYGAYYGYQC | AGGTPNKTAC | MYGGVTLHDN | NRLTEEEKVP |
| 160        | 170        | 180        | 190        | 200        |
| INLWLDGKQN | TVPLETVKTN | KKNVTVQELD | LQARRYLQEK | YNLYNSDVFD |
| 210        | 220        | 230        | 240        | 250        |
| GKVQRGLIVF | HTSTEPSVNY | DLFGAQGQNS | NTLLRIYRDN | KTINSENMH  |
| DIYLYTS    |            |            |            |            |

d) Toxin 4: *Escherichia coli*, shiga toxin Stx2, subunit A

|            |            |            |            |            |
|------------|------------|------------|------------|------------|
| 10         | 20         | 30         | 40         | 50         |
| MSVINHTPPG | SYFAVDIRGL | DVYQARFDHL | RLIIEQNNLY | VAGFVNTATN |
| 60         | 70         | 80         | 90         | 100        |
| TFYRFSDFTH | ISVPGVTTVS | MTDSSYTTL  | QRVAALERSG | MQISRHSLVS |
| 110        | 120        | 130        | 140        | 150        |
| SYLALMEFSG | NTMTRDASRA | VLRFVTVTAE | ALRFRQIQRE | FRQALSETAP |
| 160        | 170        | 180        | 190        | 200        |
| VYTMTPGDVD | LTLNWGRISN | VLPEYRGEDG | VRVGRISFNN | ISAILGTVAV |
| 210        | 220        | 230        | 240        | 250        |
| ILNCHHQGAR | SVRAVNEESQ | PECQITGDRP | VIKINNTLWE | SNTAAAFNLR |

260  
KSQFLYTTGK

e) Toxin 4: *Escherichia coli*, shiga toxin Stx2, subunit B

|            |            |            |            |            |
|------------|------------|------------|------------|------------|
| 10         | 20         | 30         | 40         | 50         |
| MKKMFMAVLF | ALASVNAMAA | DCAKGKIEFS | KYNEDDTFTV | KVDGKEYWTS |
| 60         | 70         | 80         |            |            |
| RWNLQPLLQS | AQLTGMTVTI | KSSTCESGSG | FAEVQFNND  |            |
